# Supplementary material
Source: publisher site journal article supplement (https://www.spandidos-publications.com/7820/downloadSupplementary)
Supplement: Supplementary file 1 [file downloadSupplementary]

**Table S1.** miRNAs in age-related cataracts.

| First author/s, year                                                                                   | Name           | Dysregulation | Functions                                                                                                                                                                                             | Associated network                                                  | (Refs.) |
|--------------------------------------------------------------------------------------------------------|----------------|---------------|-------------------------------------------------------------------------------------------------------------------------------------------------------------------------------------------------------|---------------------------------------------------------------------|---------|
| Li <i>et al</i> , 2020                                                                                 | miR-182-5p     | Downregulated | Promotes proliferation, and inhibits ROS production and apoptosis in H <sub>2</sub> O <sub>2</sub> -exposed LECs <i>in vitro</i> .                                                                    | miR-182-5p/NOX4, ROS, p38 MAPK                                      | (1)     |
| Fan <i>et al</i> , 2017; Wang <i>et al</i> , 2022; Xiang <i>et al</i> , 2016; Feng <i>et al</i> , 2023 | miR-34a        | Upregulated   | Inhibits proliferation, induces apoptosis and facilitates oxidative stress of LECs, and accelerates opacification of mouse lenses <i>in vitro</i> .                                                   | miR-34a/Notch2; miR-34a/E2F3; miR-34a/HK1/caspase3; miR-34a-5p/GPX3 | (2-5)   |
| Kang <i>et al</i> , 2023                                                                               | miR-125a-3p    | Upregulated   | Promotes apoptosis and decreases viability of UV-irradiation-treated LECs <i>in vitro</i> .                                                                                                           | miR-125a-3p/TMBIM4                                                  | (6)     |
| Li <i>et al</i> , 2015; Li <i>et al</i> , 2019; Abdullah <i>et al</i> , 2019; Liu <i>et al</i> , 2019  | miR-15a        | Upregulated   | Inhibits proliferation and promotes apoptosis of H <sub>2</sub> O <sub>2</sub> -treated LECs <i>in vitro</i> .                                                                                        | miR-15a/BCL2, E2F3; miR-15a/BCL2, MCL1                              | (7-10)  |
| Lu <i>et al</i> , 2018                                                                                 | miR-24         | Upregulated   | Increases cell death and apoptosis of H <sub>2</sub> O <sub>2</sub> -treated LECs <i>in vitro</i> .                                                                                                   | miR-24/p53                                                          | (11)    |
| Gong <i>et al</i> , 2019                                                                               | miR-221        | Upregulated   | Decreases the viability and promotes apoptosis of LECs <i>in vitro</i> .                                                                                                                              | miR-221/SIRT1, E2F3                                                 | (12)    |
| Liu <i>et al</i> , 2021; Zhang <i>et al</i> , 2021                                                     | miR-124        | Upregulated   | Promotes apoptosis of H <sub>2</sub> O <sub>2</sub> -exposed LECs <i>in vitro</i> .                                                                                                                   | miR-124/SPRY2, MMP-2; miR-124/PTB/Fas                               | (13,14) |
| Ren <i>et al</i> , 2018                                                                                | miR-326        | Unknown       | Promotes apoptosis of H <sub>2</sub> O <sub>2</sub> -exposed LECs <i>in vitro</i> . Furthermore, administration of its antagomir delays cataract development in rats with selenite-induced cataracts. | miR-326/FGF1/βB2                                                    | (15)    |
| Fang <i>et al</i> , 2024                                                                               | miR-29a-3p     | Unknown       | Promotes apoptosis of H <sub>2</sub> O <sub>2</sub> -treated LECs <i>in vitro</i> . Furthermore, administration of its antagomir delays cataract development in rats with selenite-induced cataracts. | miR-29a-3p/CAND1                                                    | (16)    |
| Zhang <i>et al</i> , 2016                                                                              | miR-133b       | Downregulated | Inhibits apoptosis and increases the viability of LECs <i>in vitro</i> .                                                                                                                              | miR-133b/BCL2L2                                                     | (17)    |
| Zhou <i>et al</i> , 2019                                                                               | miR - 23b - 3p | Upregulated   | Induces apoptosis and inhibits autophagy in H <sub>2</sub> O <sub>2</sub> -exposed LECs <i>in vitro</i> .                                                                                             | miR-23b-3p/SIRT1                                                    | (18)    |
| Yao <i>et al</i> , 2021                                                                                | miR-23a-3p     | Unknown       | Inhibits proliferation and promotes apoptosis of H <sub>2</sub> O <sub>2</sub> -exposed LECs <i>in vitro</i> .                                                                                        | miR-23a-3p/BCL2                                                     | (19)    |
| Xu <i>et al</i> , 2023                                                                                 | miR-210-3p     | Upregulated   | Inhibits viability and migration, promotes apoptosis, and facilitates oxidative damage in H <sub>2</sub> O <sub>2</sub> -exposed LECs <i>in vitro</i> .                                               | miR-210-3p/ATG7                                                     | (20)    |
| Luo <i>et al</i> , 2023                                                                                | miR-222-3p     | Upregulated   | Inhibits proliferation and promotes apoptosis of UV irradiation-exposed LECs <i>in vitro</i> .                                                                                                        | miR-222-3p/MGMT                                                     | (21)    |
| Shi <i>et al</i> , 2018                                                                                | miR-181a       | Unknown       | Promotes apoptosis and aggravates oxidative damage in H <sub>2</sub> O <sub>2</sub> -exposed LECs <i>in vitro</i> .                                                                                   | miR-181a/CASP3, BAX, COX-2                                          | (22)    |
| Gao <i>et al</i> , 2020; Liu <i>et al</i> , 2019                                                       | miR-378a       | Upregulated   | Inhibits proliferation and promotes apoptosis of LECs <i>in vitro</i> .                                                                                                                               | miR-378a/ROS, PI3K/AKT; miR-378a-5p/E2F3                            | (23,24) |

|                                                   |             |               |                                                                                                                                                                                                                                           |                             |         |
|---------------------------------------------------|-------------|---------------|-------------------------------------------------------------------------------------------------------------------------------------------------------------------------------------------------------------------------------------------|-----------------------------|---------|
| Qin <i>et al</i> , 2014; Zhao <i>et al</i> , 2016 | miR-125b    | Downregulated | Inhibits apoptosis of UV-irradiation-exposed LECs <i>in vitro</i> .                                                                                                                                                                       | miR-125b/p53                | (25,26) |
| Yao and Yan, 2020                                 | miR-182     | Unknown       | Inhibits oxidative stress and epithelial cell apoptosis in the lens of cataract rats.                                                                                                                                                     | miR-182/PI3K/Akt            | (27)    |
| Kang <i>et al</i> , 2019                          | miR-3912-5p | Unknown       | Binds to the 3' UTR of BER pathway genes and affects disease susceptibility.                                                                                                                                                              | miR-3912-5p/NEIL2           | (28)    |
| Zou <i>et al</i> , 2018                           | miR-589-5p  | Unknown       | Bind to the 3' UTR of NER pathway genes and affects disease susceptibility.                                                                                                                                                               | miR-589-5p/XPC              | (29)    |
| Lu <i>et al</i> , 2018                            | miR-211     | Upregulated   | Inhibits proliferation and promotes apoptosis of LECs <i>in vitro</i> .                                                                                                                                                                   | miR-211/SIRT1               | (30)    |
| Cao <i>et al</i> , 2021                           | let-7c-5p   | Upregulated   | Inhibits autophagic degradation in UV irradiation-exposed LECs <i>in vitro</i> .                                                                                                                                                          | let-7c-5p/ERCC6             | (31)    |
| Dong <i>et al</i> , 2016                          | let-7b      | Upregulated   | Induces apoptosis of UV irradiation-exposed LECs <i>in vitro</i> .                                                                                                                                                                        | let-7b/Lgr4                 | (32)    |
| Li <i>et al</i> , 2020                            | let-7c-3p   | Downregulated | Attenuates apoptosis and autophagy of H <sub>2</sub> O <sub>2</sub> -treated LECs <i>in vitro</i> .                                                                                                                                       | let-7c-3p/ATG3              | (33)    |
| Gao <i>et al</i> , 2020; Mei <i>et al</i> , 2020  | miR-630     | Upregulated   | Promotes apoptosis, and inhibits proliferation and migration of LECs <i>in vitro</i> .                                                                                                                                                    | miR-630/ALCAM; miR-630/E2F3 | (23,34) |
| Wang and Ren, 2023                                | miR-187     | Upregulated   | Induces apoptosis and aggravates oxidative damage in H <sub>2</sub> O <sub>2</sub> -exposed LECs <i>in vitro</i> . Furthermore, administration of its antagomir delays cataract development in the Emory mouse model of senile cataracts. | Unknown                     | (35)    |

NOX4, nicotinamide adenine dinucleotide phosphate oxidase subunit 4; ROS, reactive oxygen species; E2F3, E2F transcription factor 3; HK1, hexokinase 1; GPX3, glutathione peroxidase 3; TMBIM4, transmembrane Bax inhibitor motif containing 4; MCL1, myeloid cell leukemia sequence 1; SIRT1, silent information regulator 1; SPRY2, protein sprouty homolog 2; PTB, polypyrimidine tract-binding protein; FGF1, fibroblast growth factor 1;  $\beta$ B2,  $\beta$ -crystallin B2; BCL2L2, B-cell lymphoma-2-like-2; ATG7, autophagy-related gene; CASP3, apoptosis-related gene caspase-3; COX-2, cyclooxygenase 2; NEIL2, Nei-like DNA glycosylase 2; Lgr4, leucine-rich repeat containing G protein-coupled receptor 4; ALCAM, activated leukocyte cell adhesion molecule; 3' UTR, 3' untranslated region; BER, base excision repair; NER, nucleotide excision repair; CAND1, cullin-associated NEDD8-dissociated protein 1; ERCC6, excision repair cross-complementing rodent repair deficiency, complementation group 6; H<sub>2</sub>O<sub>2</sub>, hydrogen peroxide; HK1, hexokinase 1; LEC, lens epithelial cell; MGMT, O6-methylguanine-DNA methyltransferase; miRNA/miR, microRNA; UV, ultraviolet; XPC, xeroderma pigmentosum complementation group C.

**Table SIII.** Long non-coding RNAs in age-related cataracts.

| First author/s, year                                                   | Name            | Dysregulation | Functions                                                                                                                                                                                | Associated network                                                                  | (Refs.) |
|------------------------------------------------------------------------|-----------------|---------------|------------------------------------------------------------------------------------------------------------------------------------------------------------------------------------------|-------------------------------------------------------------------------------------|---------|
| Li <i>et al</i> , 2017; Shen and Zhou, 2021; Sun <i>et al</i> , 2023   | TUG1            | Upregulated   | Inhibits the viability and promotes apoptosis of H <sub>2</sub> O <sub>2</sub> -exposed or UV irradiation-exposed LECs <i>in vitro</i> .                                                 | TUG1/miR-196a-5p; TUG1/miR-421/caspase-3; TUG1/miR-29b/Smac                         | (36-38) |
| Jin <i>et al</i> , 2017; Xu <i>et al</i> , 2022; Zhang and Cheng, 2021 | KCNQ1OT1        | Upregulated   | Promotes apoptosis and pyroptosis, and aggravates oxidative stress in H <sub>2</sub> O <sub>2</sub> -exposed LECs <i>in vitro</i> .                                                      | KCNQ1OT1/miR-223-3p/BCL2L2; KCNQ1OT1/miR-214/caspase-1; KCNQ1OT1/miR-124-3p/BCL2L11 | (39-41) |
| Guo <i>et al</i> , 2023; Zhou <i>et al</i> , 2020                      | NEAT1           | Upregulated   | Promotes apoptosis, aggravates oxidative damage and inhibits proliferation of H <sub>2</sub> O <sub>2</sub> -exposed LECs <i>in vitro</i> .                                              | NEAT1/NF-κB p65, p38 MAPK; NEAT1/miR-124-3p/DAPK1                                   | (42,43) |
| Li <i>et al</i> , 2023                                                 | DCLRE1A         | Upregulated   | Promotes repair of oxidative DNA damage, enhances cell viability and inhibits apoptosis of H <sub>2</sub> O <sub>2</sub> -exposed LECs <i>in vitro</i> .                                 | Unknown                                                                             | (44)    |
| Cheng <i>et al</i> , 2019; Liu <i>et al</i> , 2018                     | H19             | Upregulated   | Inhibits apoptosis, alleviates oxidative damage, and enhances the proliferation and migration of H <sub>2</sub> O <sub>2</sub> -exposed or UV irradiation-exposed LECs <i>in vitro</i> . | H19/miR-675/CRYAA; H19/miR-29a/TDG                                                  | (45,46) |
| Tu <i>et al</i> , 2020; Zhang <i>et al</i> , 2024                      | MEG3            | Upregulated   | Promotes apoptosis and ferroptosis in H <sub>2</sub> O <sub>2</sub> -exposed LECs <i>in vitro</i> , and exacerbates oxidative stress-induced lens opacity.                               | MEG3/PTBP1/GPX4; MEG3/miR-223, p53/TP53INP1                                         | (47,48) |
| Xiang <i>et al</i> , 2019                                              | PLCD3-OT1       | Downregulated | Increases viability and inhibits apoptosis in UV irradiation-exposed LECs <i>in vitro</i> .                                                                                              | PLCD3-OT1/miR-224-5p/PLCD3                                                          | (49)    |
| Zhou <i>et al</i> , 2020                                               | NONHSAT143692.2 | Downregulated | Inhibits apoptosis, alleviates oxidative damage and promotes the proliferation of UV irradiation-exposed LECs <i>in vitro</i> .                                                          | NONHSAT143692.2/miR-4728-5p/OGG1                                                    | (50)    |
| Jing <i>et al</i> , 2020                                               | OIP5-AS1        | Upregulated   | Promotes apoptosis of H <sub>2</sub> O <sub>2</sub> -exposed LECs <i>in vitro</i> and exacerbates lens opacity.                                                                          | TFAP2A/OIP5-AS1/POLG                                                                | (51)    |
| Tu <i>et al</i> , 2019                                                 | GPX3-AS         | Downregulated | Inhibits apoptosis of H <sub>2</sub> O <sub>2</sub> -exposed LECs <i>in vitro</i> .                                                                                                      | GPX3-AS/GPX3                                                                        | (52)    |

Smac, second mitochondria-derived activator of caspases; BCL2L2, B-cell lymphoma-2-like-2; BCL2L11, BCL-2-like 11; DAPK1, death-associated protein kinase 1; CRYAA, crystallin  $\alpha$ A; TDG, thymine DNA glycosylase; GPX4, glutathione peroxidase 4; PLCD3, 1-phosphatidylinositol-4,5-bisphosphate phosphodiesterase  $\delta$ 3; OGG1, 8-oxoguanine DNA glycosylase; POLG, polymerase  $\gamma$ ; TFAP2A, transcription factor AP-2 (activating enhancer binding protein 2 $\alpha$ ); GPX3, glutathione peroxidase 3; H<sub>2</sub>O<sub>2</sub>, hydrogen peroxide; LEC, lens epithelial cell; miR, microRNA; PTBP1, polypyrimidine tract binding protein 1; UV, ultraviolet.

**Table SIII.** Circular RNAs in age-related cataracts.

| First author/s, year                                                       | Name             | Dysregulation | Functions                                                                                                                                                                               | Associated network                                                                        | (Refs.) |
|----------------------------------------------------------------------------|------------------|---------------|-----------------------------------------------------------------------------------------------------------------------------------------------------------------------------------------|-------------------------------------------------------------------------------------------|---------|
| Chen <i>et al</i> , 2023; Cui <i>et al</i> , 2020; Liu <i>et al</i> , 2018 | circHIPK3        | Downregulated | Enhances viability and proliferation, inhibits apoptosis, and mitigates oxidative damage in H <sub>2</sub> O <sub>2</sub> -exposed LECs <i>in vitro</i> .                               | circHIPK3/miR-221-3p/PI3K/AKT;<br>circHIPK3/miR-193a/CRYAA;<br>circHIPK3/miR-495-3p/HDAC4 | (53-55) |
| Liang <i>et al</i> , 2020; Xu <i>et al</i> , 2021                          | circZNF292       | Downregulated | Inhibits apoptosis, alleviates oxidative damage, and enhances viability of H <sub>2</sub> O <sub>2</sub> -exposed LECs <i>in vitro</i> .                                                | circZNF292/miR-222-3p/E2F3;<br>circZNF292/miR-23b-3p                                      | (56,57) |
| Zhou <i>et al</i> , 2021                                                   | circ_EPB41       | Downregulated | Ameliorates apoptosis in UV irradiation-exposed LECs <i>in vitro</i> .                                                                                                                  | circ_EPB41/miR-24-3p/BPNT1                                                                | (58)    |
| Liu <i>et al</i> , 2022                                                    | circ_0060,144    | Downregulated | Promotes proliferation, inhibits apoptosis and alleviates oxidative damage of LECs <i>in vitro</i> .                                                                                    | circ_0060,144/miR-23b-3p/HIPK3                                                            | (59)    |
| He <i>et al</i> , 2022; Wu <i>et al</i> , 2024                             | circ_0122396     | Downregulated | Promotes proliferation, and attenuates apoptosis and oxidative stress of H <sub>2</sub> O <sub>2</sub> -exposed LECs <i>in vitro</i> .                                                  | circ_0122396/miR-15a-5p/FGF1;<br>circ_0122396/miR-23a-3p/MMP16                            | (60,61) |
| Cui <i>et al</i> , 2024; Ma <i>et al</i> , 2023                            | circMAP3K4       | Downregulated | Enhances proliferation, inhibits apoptosis and senescence, alleviates cell cycle arrest and decreases oxidative stress in H <sub>2</sub> O <sub>2</sub> -exposed LECs <i>in vitro</i> . | circMAP3K4/miR-630/ERCC6;<br>circMAP3K4/miR-193a-3p/PLCD3                                 | (62,63) |
| Wang <i>et al</i> , 2021                                                   | circ_0004058     | Downregulated | Inhibits apoptosis and promotes autophagy of H <sub>2</sub> O <sub>2</sub> -exposed LECs <i>in vitro</i> .                                                                              | circ_0004058/miR-186/ATG7                                                                 | (64)    |
| Mao and Zhang, 2025                                                        | hsa_circ_0105558 | Upregulated   | Promotes apoptosis and aggravates the oxidative damage of H <sub>2</sub> O <sub>2</sub> -treated LECs <i>in vitro</i> .                                                                 | hsa_circ_0105558/miR-182-5p/ATF6                                                          | (65)    |
| Liu <i>et al</i> , 2021                                                    | circMRE11A       | Upregulated   | Inhibits viability and induces cell cycle arrest of UV irradiation-exposed LECs <i>in vitro</i> . Accelerates lens aging and opacification in mice.                                     | circMRE11A/UBXN1/ATM                                                                      | (66)    |
| Wu <i>et al</i> , 2022                                                     | circMED12L       | Downregulated | Alleviates viability inhibition and apoptotic and oxidative damage of H <sub>2</sub> O <sub>2</sub> -exposed LECs <i>in vitro</i> .                                                     | circMED12L/miR-34a-5p/ALCAM                                                               | (67)    |

|                           |                  |               |                                                                                                                                                                                 |                                              |      |
|---------------------------|------------------|---------------|---------------------------------------------------------------------------------------------------------------------------------------------------------------------------------|----------------------------------------------|------|
| Fang <i>et al.</i> , 2023 | circRNA 06209    | Unknown       | Enhances proliferation and inhibits apoptosis of H <sub>2</sub> O <sub>2</sub> -exposed LECs <i>in vitro</i> , and inhibits selenite-induced cataract formation in a rat model. | circRNA 06209/miR-6848-5p/ALOX15             | (68) |
| Sun <i>et al.</i> , 2024  | circ_HLCS        | Downregulated | Attenuates proliferation inhibition and apoptosis of UV irradiation-exposed LECs <i>in vitro</i> .                                                                              | circ_HLCS/miR-338-3p/BPNT1                   | (69) |
| Li <i>et al.</i> , 2023   | has_circ_0007905 | Upregulated   | Inhibits proliferation and causes apoptosis in LECs <i>in vitro</i> .                                                                                                           | METTL3/has_circ_0007905/miR-6749-3p/EIF4EBP1 | (70) |
| Li <i>et al.</i> , 2024   | circSTRBP        | Upregulated   | Inhibits proliferation, promotes apoptosis and facilitates oxidative stress in H <sub>2</sub> O <sub>2</sub> -exposed LECs <i>in vitro</i> .                                    | circSTRBP/IGF2BP1/NOX4                       | (71) |
| Guo <i>et al.</i> , 2023  | circSTK39        | Downregulated | Alleviates proliferation inhibition and apoptotic and oxidative damage in H <sub>2</sub> O <sub>2</sub> -exposed LECs <i>in vitro</i> .                                         | circSTK39/miR-125a-5p/ERCC6                  | (72) |

HIPK3, homeodomain interacting protein kinase 3; CRYAA, crystallin  $\alpha$ A; HDAC4, histone deacetylase 4; E2F3, E2F transcription factor 3; BPNT1, 3'(2'), 5'-bisphosphate nucleotidase 1; FGF1, fibroblast growth factor 1; PLCD3, phospholipase C  $\delta$ 3; ATG7, autophagy-related gene 7; ATF6, activating transcription factor 6; UBXN1, UBX domain-containing protein 1; ATM, ataxia-telangiectasia mutated kinase; IGF2BP1, insulin-like growth factor 2 mRNA-binding protein 1; NOX4, nicotinamide adenine dinucleotide phosphate oxidase subunit 4; ERCC6, excision repair cross-complementing rodent repair deficiency, complementation group 6; ALCAM, activated leukocyte cell adhesion molecule; ALOX15, recombinant arachidonate-15-lipoxygenase; circ, circular RNA; EIF4EBP1, eukaryotic translation initiation factor 4E binding protein 1; H<sub>2</sub>O<sub>2</sub>, hydrogen peroxide; LEC, lens epithelial cell; METTL3, methyltransferase-like 3; miR, microRNA; UV, ultraviolet.

**Table SIV.** DNA methylation in age-related cataracts.

| <b>First author/s, year</b> | <b>Gene</b>   | <b>Cell/tissue type</b>                                                                                                                                        | <b>Methylation measures</b>                                                                                                                | <b>Main findings</b>                                                                                                                                                                                                                                                                   | <b>(Refs.)</b> |
|-----------------------------|---------------|----------------------------------------------------------------------------------------------------------------------------------------------------------------|--------------------------------------------------------------------------------------------------------------------------------------------|----------------------------------------------------------------------------------------------------------------------------------------------------------------------------------------------------------------------------------------------------------------------------------------|----------------|
| Wang <i>et al</i> , 2016    | <i>ERCC6</i>  | LECs of patients with ARNCs and age-matched controls who had their transparent lens extracted because of vitreoretinal diseases; HLE-B3 cells; 239T cell lines | Levels of cytosine hypermethylation in a special CpG site that controls <i>ERCC6</i> transcription using pyrosequencing                    | mRNA and protein expression levels of <i>ERCC6</i> in LECs were lower in ARNCs than in the controls; UVB radiation triggered hypermethylation of the CpG site in the <i>ERCC6</i> promoter, histone H3K9 deacetylation of <i>ERCC6</i> and repression of <i>ERCC6</i> gene expression. | (73)           |
| Zhou <i>et al</i> , 2012    | <i>CRYAA</i>  | Human lens epithelium samples of patients with ARNCs and non-ARC patients                                                                                      | Methylation status of the CpG islands of <i>CRYAA</i> promoter using BSP                                                                   | mRNA and protein levels of <i>CRYAA</i> were reduced in the lens epithelia of ARNC cases, which corresponded to hypermethylation of the CpG island of the <i>CRYAA</i> promoter.                                                                                                       | (74)           |
| Wang <i>et al</i> , 2015    | <i>OGG1</i>   | Lens cortex of patients with ARCs and age-matched individuals who had their transparent lens extracted because of vitreoretinal diseases                       | Methylation status of CpG islands near <i>OGG1</i> in DNA extracted from lens cortex using BSP                                             | mRNA and protein levels of <i>OGG1</i> were reduced in the lens cortex of ARC; the CpG island in the first exon of <i>OGG1</i> displayed hypermethylation in the DNA extracted from the lens cortex of ARC.                                                                            | (75)           |
| Gao <i>et al</i> , 2015     | <i>Keap1</i>  | Healthy clear lenses from donors aged between 15 and 80 years and cataract lenses from patients aged between 45 and 90 years                                   | Age-dependent DNA methylation status in the promoter region of the <i>Keap1</i> gene using BSP                                             | DNA demethylation in the <i>Keap1</i> promoter increased with age; demethylation of the <i>Keap1</i> promoter was found in cataract lenses and clear lenses of patients aged between 66 and 80 years.                                                                                  | (76)           |
| Wang <i>et al</i> , 2024    | <i>COL4A1</i> | HLE-B3 cells; anterior lens capsules of Sprague Dawley rats                                                                                                    | Methylation status of CpG islands located in the <i>COL4A1</i> promoter using BSP                                                          | DNA hypermethylation of <i>COL4A1</i> promoter CpG islands was associated with decreased <i>COL4A1</i> expression in UVB-induced HLE-B3 cells and anterior lens capsules of rats.                                                                                                      | (77)           |
| Zhu <i>et al</i> , 2015     | <i>WRN</i>    | Anterior lens capsules from patients with ARCs and age-matched non-ARC patients                                                                                | Methylation status of the CpG islands of the <i>WRN</i> promoter in the DNA extracted from the anterior lens capsules and cortex using BSP | <i>WRN</i> expression was decreased in the ARC anterior lens capsules; the CpG island of the <i>WRN</i> promoter in the ARC anterior lens capsules displayed hypermethylation compared with the samples from non-ARC patients.                                                         | (78)           |

|                          |               |                                                                                                                                                                            |                                                                                                                                                         |                                                                                                                                                                                                                                                                                                                           |      |
|--------------------------|---------------|----------------------------------------------------------------------------------------------------------------------------------------------------------------------------|---------------------------------------------------------------------------------------------------------------------------------------------------------|---------------------------------------------------------------------------------------------------------------------------------------------------------------------------------------------------------------------------------------------------------------------------------------------------------------------------|------|
| Li <i>et al</i> , 2014   | <i>MGMT</i>   | Centred anterior capsules of the lens from eyes with ARCs and rhegmatogenous retinal detachment eyes undergoing vitrectomy combined with extracapsular cataract extraction | Methylation status of the CpG islands of DNA repair genes using BSP                                                                                     | mRNA levels of 10 DNA repair genes were decreased, and the levels of one DNA repair gene were increased in LECs of patients with ARC. The promoter region of the <i>MGMT</i> gene was hypermethylated in ARC tissue compared with tissue without ARC.                                                                     | (79) |
| Chen <i>et al</i> , 2017 | <i>GSTP1</i>  | Anterior LE, LC and LN of patients with ARNCs and age-matched controls with normal or mild ARNC severity                                                                   | Methylation status of two CpG islands near the <i>GSTP1</i> promoter (the regions from -819 to -533 bp and from -201 to +86 bp, respectively) using BSP | <i>GSTP1</i> mRNA and protein levels were reduced in the lens epithelium and cortex of ARNC cases compared with controls. The changes corresponded to hypermethylation of the <i>GSTP1</i> promoter CpG islands.                                                                                                          | (80) |
| Li <i>et al</i> , 2016   | <i>GSTM3</i>  | The LECs and lens cortex of patients with ARCs and patients with vitreoretinal diseases who received transparent lens extraction; HLE cell lines, SRA01/04 and HLE-B3      | Methylation status of the <i>GSTM3</i> promoter in the DNA extracted from the LECs and lens cortex, and in HLE cell lines, using BSP and pyrosequencing | Expression levels of <i>GSTM3</i> were decreased in ARC lens tissues, which was associated with hypermethylation of the <i>GSTM3</i> promoter. Lower levels of <i>GSTM3</i> were detected in HLEB3 cells than in SRA01/04 cells, while HLEB3 cells displayed hypermethylation of <i>GSTM3</i> and SRA01/04 cells did not. | (81) |
| Jin <i>et al</i> , 2015  | <i>Klotho</i> | LECs of normal transparent lenses and ARCs                                                                                                                                 | Methylation level of the <i>Klotho</i> gene using MSP                                                                                                   | <i>Klotho</i> was positively expressed in the LECs of healthy individuals at the mRNA and protein level. Its promoter showed increased methylation as age increased, resulting in <i>Klotho</i> gene silencing and downregulated expression or no expression of the <i>Klotho</i> protein.                                | (82) |

ARNCs, age-related nuclear cataracts; UVB, ultraviolet-B; ERCC6, excision repair cross-complementing rodent repair deficiency, complementation group 6; CRYAA, crystallin  $\alpha$ A; BSP, bisulfite-sequencing PCR; OGG1, 8-oxoguanine DNA glycosylase 1; Keap1, kelch-like ECH-associated protein 1; WRN, Werner syndrome gene; *MGMT*, O6-methylguanine-DNA methyl-transferase; *GSTP1*, glutathione S-transferase P1; LE, lens epithelium; LC, lens peripheral cortex; LN, lens nucleus; *GSTM3*, glutathione S-transferase Mu 3; MSP, methylation specific polymerase chain reaction; ARC, age-related cataract; COL4A1, collagen type IV  $\alpha$ 1 chain; LEC, lens epithelial cell.

**Table SV.** Histone modifications in age-related cataracts.

| <b>A, Acetylation</b>       |                           |             |                                                                                                                                                                                                                                                                                                                               |                |
|-----------------------------|---------------------------|-------------|-------------------------------------------------------------------------------------------------------------------------------------------------------------------------------------------------------------------------------------------------------------------------------------------------------------------------------|----------------|
| <b>First author/s, year</b> | <b>Modification sites</b> | <b>Gene</b> | <b>Effects/main findings</b>                                                                                                                                                                                                                                                                                                  | <b>(Refs.)</b> |
| Wang <i>et al</i> , 2016    | H3K9                      | ERCC6       | In HLE-B3 cells, HDAC1 recruitment at the ERCC6 promoter was induced after exposure to UVB and deacetylation of H3K9 increased in this region; inhibition of HDAC1 activated the ERCC6 promoter and restored gene expression.                                                                                                 | (73)           |
| Zhu <i>et al</i> , 2015     | H3                        | WRN         | Acetylated H3 levels were lower in all three subtypes of ARCs than in the non-ARCs in anterior lens capsules.                                                                                                                                                                                                                 | (78)           |
| Li <i>et al</i> , 2016      | H3                        | GSTM3       | Acetylated H3 levels were lower in HLE-B3 cells than in SRA01/04 cells; after treatment with histone deacetylase inhibitor, HLE-B3 cells exhibited increased GSTM3 expression.                                                                                                                                                | (81)           |
| Chen <i>et al</i> , 2017    | H3 and H4                 | GSTP1       | Acetylated H3 and H4 levels were lower in the lens epithelium of patients with ARNC compared with non-ARNC controls.                                                                                                                                                                                                          | (80)           |
| Rong <i>et al</i> , 2016    | H3 and H4                 | SOD1        | Both H3 and H4 were deacetylated at -600 bp of the SOD1 promoter in the lens epithelium of ARC; reducing histone acetylation with a HAT inhibitor could decrease SOD1 expression and induce cataract formation <i>in vitro</i> ; the HDAC inhibitor effectively prevented the cataract formation effect of the HAT inhibitor. | (83)           |
| <b>B, Methylation</b>       |                           |             |                                                                                                                                                                                                                                                                                                                               |                |
| <b>First author/s, year</b> | <b>Modification sites</b> | <b>Gene</b> | <b>Effects/main findings</b>                                                                                                                                                                                                                                                                                                  | <b>(Refs.)</b> |
| Zhu <i>et al</i> , 2015     | H3K9                      | WRN         | Methylated H3K9 was increased in all three subtypes of ARCs compared with in the non-ARCs in anterior lens capsules.                                                                                                                                                                                                          | (78)           |
| Li <i>et al</i> , 2016      | H3K9                      | GSTM3       | Trimethylated H3K9 levels were higher in HLE-B3 cells than in SRA01/04 cells.                                                                                                                                                                                                                                                 | (81)           |
| Chen <i>et al</i> , 2017    | H3K4 and H3K9             | GSTP1       | Methylated H3K4 was reduced while methylated H3K9 was increased in lens epithelium of ARNC cases.                                                                                                                                                                                                                             | (80)           |

UVB, ultraviolet-B; WRN, Werner syndrome gene; GSTM3, glutathione S-transferase Mu 3; GSTP1, glutathione S-transferase P1; ARNC, age-related nuclear cataract; SOD1, superoxide dismutase 1; ARC, age-related cataract; ERCC6, excision repair cross-complementing rodent repair deficiency, complementation group 6; HAT, histone acetyltransferase; HDAC1, histone deacetylase 1.

## References

1. Li ZN, Ge MX and Yuan ZF: MicroRNA-182-5p protects human lens epithelial cells against oxidative stress-induced apoptosis by inhibiting NOX4 and p38 MAPK signalling. *BMC Ophthalmol* 20: 233, 2020.
2. Fan F, Zhuang J, Zhou P, Liu X and Luo Y: MicroRNA-34a promotes mitochondrial dysfunction-induced apoptosis in human lens epithelial cells by targeting Notch2. *Oncotarget* 8: 110209-110220, 2017.
3. Wang S, Yu M, Yan H, Liu J and Guo C: MiR-34a-5p Negatively Regulates Oxidative Stress on Lens Epithelial Cells by Silencing GPX3 - A Novel Target. *Curr Eye Res* 47: 727-734, 2022.
4. Xiang W, Lin H, Wang Q, et al.: miR-34a suppresses proliferation and induces apoptosis of human lens epithelial cells by targeting E2F3. *Mol Med Rep* 14: 5049-5056, 2016.
5. Feng L, Wei Y, Sun Y, et al.: MIR34A modulates lens epithelial cell apoptosis and cataract development via the HK1/caspase 3 signaling pathway. *Aging (Albany NY)* 15: 6331-6345, 2023.
6. Kang L, Luo J, Li P, et al.: miR-125a-3p regulates apoptosis by suppressing TMBIM4 in lens epithelial cells. *Int Ophthalmol* 43: 1261-1274, 2023.
7. Li Y, Liu S, Zhang F, Jiang P, Wu X and Liang Y: Expression of the microRNAs hsa-miR-15a and hsa-miR-16-1 in lens epithelial cells of patients with age-related cataract. *Int J Clin Exp Med* 8: 2405-2410, 2015.
8. Li Q, Pan H and Liu Q: MicroRNA-15a modulates lens epithelial cells apoptosis and proliferation through targeting B-cell lymphoma-2 and E2F transcription factor 3 in age-related cataracts. *Biosci Rep* 39, 2019.
9. Abdullah OA, El Gazzar WB, Salem TI, Elmohamady MN, Nasif SN and Eltaher SM: miR-15a: a potential diagnostic biomarker and a candidate for non-operative therapeutic modality for age-related cataract. *Br J Biomed Sci* 76: 184-189, 2019.
10. Liu SJ, Wang WT, Zhang FL, et al.: miR-15a-3p affects the proliferation, migration and apoptosis of lens epithelial cells. *Mol Med Rep* 19: 1110-1116, 2019.
11. Lu B, Christensen IT, Ma LW, et al.: miR-24-p53 pathway evoked by oxidative stress promotes lens epithelial cell apoptosis in age-related cataracts. *Mol Med Rep* 17: 5021-5028, 2018.
12. Gong W, Li J, Wang Y, Meng J and Zheng G: miR-221 promotes lens epithelial cells apoptosis through interacting with SIRT1 and E2F3. *Chem Biol Interact* 306: 39-46, 2019.
13. Liu Y, Li S, Liu Y, Lv X and Zhou Q: MicroRNA-124 facilitates lens epithelial cell apoptosis by inhibiting SPRY2 and MMP-2. *Mol Med Rep* 23, 2021.
14. Zhang K, Yin Y, Pei C and Wu C: MicroRNA-124 regulates lens epithelial cell apoptosis by affecting Fas alternative splicing by targeting polypyrimidine tract-binding protein in age-related cataract. *Clin Exp Ophthalmol* 49: 591-605, 2021.
15. Ren H, Tao H, Gao Q, et al.: MiR-326 antagomir delays the progression of age-related cataract by upregulating FGF1-mediated expression of betaB2-crystallin. *Biochem Biophys Res Commun* 505: 505-510, 2018.
16. Fang R, Li HL, Lv NX, et al.: Inhibition of miR-29a-3p Alleviates Apoptosis of Lens Epithelial Cells via Upregulation of CAND1. *Curr Eye Res* 49: 391-400, 2024.
17. Zhang F, Meng W and Tong B: Down-Regulation of MicroRNA-133b Suppresses Apoptosis of Lens Epithelial Cell by Up-Regulating BCL2L2 in Age-Related Cataracts. *Med Sci Monit* 22: 4139-4145, 2016.
18. Zhou W, Xu J, Wang C, Shi D and Yan Q: miR-23b-3p regulates apoptosis and autophagy via suppressing SIRT1 in lens epithelial cells. *J Cell Biochem* 120: 19635-19646, 2019.
19. Yao P, Jiang J, Ma X, Chen Z, Hong Y and Wu Y: miR-23a-3p regulates the proliferation and apoptosis of human lens epithelial cells by targeting Bcl-2 in an in vitro model of cataracts. *Exp Ther Med* 21: 436, 2021.
20. Xu C, Xu J, Zhang W, Zheng F and Lou X: Expression of miR-210-3p in the aqueous humor of patients with age-related cataracts and its effect on human lens epithelial cell injury induced by hydrogen peroxide. *Arq Bras Oftalmol* 87: e20220274, 2023.
21. Luo J, Li P, Kang L, et al.: Exosomal microRNA-222-3p increases UVB sensitivity of lens epithelium cells by suppressing MGMT. *Int Ophthalmol* 43: 1611-1628, 2023.
22. Shi Z, Su Y, Wang F and Liu P: Downregulation of microRNA-181a attenuates hydrogen peroxide-induced human lens epithelial cell apoptosis in vitro. *Mol Med Rep* 17: 6009-6015, 2018.
23. Gao W, Zhou X and Lin R: miR-378a-5p and miR-630 induce lens epithelial cell apoptosis in cataract via suppression of E2F3. *Braz J Med Biol Res* 53: e9608, 2020.

24. Liu Y, Li H and Liu Y: microRNA-378a Regulates the Reactive Oxygen Species (ROS)/Phosphatidylinositol 3-Kinases (PI3K)/AKT Signaling Pathway in Human Lens Epithelial Cells and Cataract. *Med Sci Monit* 25: 4314-4321, 2019.
25. Qin Y, Zhao J, Min X, et al.: MicroRNA-125b inhibits lens epithelial cell apoptosis by targeting p53 in age-related cataract. *Biochim Biophys Acta* 1842: 2439-2447, 2014.
26. Zhao Y, Li X and Zhu S: rs78378222 polymorphism in the 3'-untranslated region of TP53 contributes to development of age-associated cataracts by modifying microRNA-125b-induced apoptosis of lens epithelial cells. *Mol Med Rep* 14: 2305-2310, 2016.
27. Yao L and Yan H: MiR-182 inhibits oxidative stress and epithelial cell apoptosis in lens of cataract rats through PI3K/Akt signaling pathway. *Eur Rev Med Pharmacol Sci* 24: 12001-12008, 2020.
28. Kang L, Zou X, Zhang G, et al.: A variant in a microRNA binding site in NEIL2 3'UTR confers susceptibility to age-related cataracts. *Faseb j* 33: 10469-10476, 2019.
29. Zou X, Kang L, Yang M, Wu J and Guan H: MicroRNA binding mediated Functional sequence variant in 3'-UTR of DNA repair Gene XPC in Age-related Cataract. *Sci Rep* 8: 15198, 2018.
30. Lu B, Christensen IT, Ma LW, et al.: miR-211 promotes lens epithelial cells apoptosis by targeting silent mating-type information regulation 2 homolog 1 in age-related cataracts. *Int J Ophthalmol* 11: 201-207, 2018.
31. Cao Y, Li P, Zhang G, et al.: MicroRNA Let-7c-5p-Mediated Regulation of ERCC6 Disrupts Autophagic Flux in Age-Related Cataract via the Binding to VCP. *Curr Eye Res* 46: 1353-1362, 2021.
32. Dong Y, Zheng Y, Xiao J, Zhu C and Zhao M: MicroRNA let-7b induces lens epithelial cell apoptosis by targeting leucine-rich repeat containing G protein-coupled receptor 4 (Lgr4) in age-related cataract. *Exp Eye Res* 147: 98-104, 2016.
33. Li T, Huang Y, Zhou W and Yan Q: Let-7c-3p Regulates Autophagy under Oxidative Stress by Targeting ATG3 in Lens Epithelial Cells. *Biomed Res Int* 2020: 6069390, 2020.
34. Mei L, Yan H, Wang S, et al.: Upregulation of miR-630 Induced by Oxidative Damage Resists Cell Migration Through Targeting ALCAM in Human Lens Epithelium Cells. *Curr Eye Res* 45: 153-161, 2020.
35. Wang F and Ren Y: Nanofluorescence Probe in Detection of miR-187 and Its Correlation with Oxidative Stress Response in Cataracts. *Altern Ther Health Med* 29: 73-79, 2023.
36. Li G, Song H, Chen L, Yang W, Nan K and Lu P: TUG1 promotes lens epithelial cell apoptosis by regulating miR-421/caspase-3 axis in age-related cataract. *Exp Cell Res* 356: 20-27, 2017.
37. Shen Q and Zhou T: Knockdown of lncRNA TUG1 protects lens epithelial cells from oxidative stress-induced injury by regulating miR-196a-5p expression in age-related cataracts. *Exp Ther Med* 22: 1286, 2021.
38. Sun M, Li K, Li X, Wang H, Li L and Zheng G: lncRNA TUG1 regulates Smac/DIABLO expression by competitively inhibiting miR-29b and modulates the apoptosis of lens epithelial cells in age-related cataracts. *Chin Med J (Engl)* 136: 2340-2350, 2023.
39. Jin X, Jin H, Shi Y, Guo Y and Zhang H: Long Non-Coding RNA KCNQ1OT1 Promotes Cataractogenesis via miR-214 and Activation of the Caspase-1 Pathway. *Cell Physiol Biochem* 42: 295-305, 2017.
40. Xu Y, Zheng Y, Shen P and Zhou L: Role of long noncoding RNA KCNQ1 overlapping transcript 1/microRNA-124-3p/BCL-2-like 11 axis in hydrogen peroxide (H<sub>2</sub>O<sub>2</sub>)-stimulated human lens epithelial cells. *Bioengineered* 13: 5035-5045, 2022.
41. Zhang M and Cheng K: Long non-coding RNA KCNQ1OT1 promotes hydrogen peroxide-induced lens epithelial cell apoptosis and oxidative stress by regulating miR-223-3p/BCL2L2 axis. *Exp Eye Res* 206: 108543, 2021.
42. Guo X, Li C, Wang Y, Jiang C and Yang L: Long non-coding RNA nuclear paraspeckle assembly transcript 1 downregulation protects lens epithelial cells from oxidative stress-induced apoptosis by regulating the microRNA-124-3p/death-associated protein kinase 1 axis in age-related cataract. *Int Ophthalmol* 43: 3413-3424, 2023.
43. Zhou T, Yang M, Zhang G, Kang L, Yang L and Guan H: Long non-coding RNA nuclear paraspeckle assembly transcript 1 protects human lens epithelial cells against H<sub>2</sub>O<sub>2</sub> stimuli through the nuclear factor kappa b/p65 and p38/mitogen-activated protein kinase axis. *Ann Transl Med* 8: 1653, 2020.
44. Li P, Zhong R, Yu J, et al.: DCLRE1A Contributes to DNA Damage Repair and Apoptosis in Age-Related Cataracts by Regulating the lncRNA/miRNA/mRNA Axis. *Curr Eye Res* 48:

992-1005, 2023.

45. Cheng T, Xu M, Qin B, et al.: lncRNA H19 contributes to oxidative damage repair in the early age-related cataract by regulating miR-29a/TDG axis. *J Cell Mol Med* 23: 6131-6139, 2019.
46. Liu X, Liu C, Shan K, et al.: Long Non-Coding RNA H19 Regulates Human Lens Epithelial Cells Function. *Cell Physiol Biochem* 50: 246-260, 2018.
47. Tu Y, Xie L, Chen L, et al.: Long non-coding RNA MEG3 promotes cataractogenesis by upregulating TP53INP1 expression in age-related cataract. *Exp Eye Res* 199: 108185, 2020.
48. Zhang X, Zheng C, Zhao J, Xu X and Yao J: LncRNA MEG3 regulates ferroptosis of lens epithelial cells via PTBP1/GPX4 axis to participate in age-related cataract. *J Cell Physiol* 239: e31330, 2024.
49. Xiang J, Chen Q, Kang L, et al.: LncRNA PLCD3-OT1 Functions as a CeRNA to Prevent Age-Related Cataract by Sponging miR-224-5p and Regulating PLCD3 Expression. *Invest Ophthalmol Vis Sci* 60: 4670-4680, 2019.
50. Zhou T, Zhang J, Qin B, Xu H, Zhang S and Guan H: Long non-coding RNA NONHSAT143692.2 is involved in oxidative DNA damage repair in the lens by regulating the miR-4728-5p/OGG1 axis. *Int J Mol Med* 46: 1838-1848, 2020.
51. Jing R, Ma B, Qi T, et al.: Long Noncoding RNA OIP5-AS1 Promotes Cell Apoptosis and Cataract Formation by Blocking POLG Expression Under Oxidative Stress. *Invest Ophthalmol Vis Sci* 61: 3, 2020.
52. Tu Y, Li L, Qin B, et al.: Long noncoding RNA glutathione peroxidase 3-antisense inhibits lens epithelial cell apoptosis by upregulating glutathione peroxidase 3 expression in age-related cataract. *Mol Vis* 25: 734-744, 2019.
53. Chen S, Wang M, Jian R, et al.: Circ\_HIPK3 Inhibits H(2)O(2)-Induced Lens Epithelial Cell Injury in Age-Related Cataract Depending on the Regulation of miR-495-3p/HDAC4 Pathway. *Biochem Genet* 61: 565-577, 2023.
54. Cui G, Wang L and Huang W: Circular RNA HIPK3 regulates human lens epithelial cell dysfunction by targeting the miR-221-3p/PI3K/AKT pathway in age-related cataract. *Exp Eye Res* 198: 108128, 2020.
55. Liu X, Liu B, Zhou M, et al.: Circular RNA HIPK3 regulates human lens epithelial cells proliferation and apoptosis by targeting the miR-193a/CRYAA axis. *Biochem Biophys Res Commun* 503: 2277-2285, 2018.
56. Liang S, Dou S, Li W and Huang Y: Profiling of circular RNAs in age-related cataract reveals circZNF292 as an antioxidant by sponging miR-23b-3p. *Aging (Albany NY)* 12: 17271-17287, 2020.
57. Xu X, Gao R, Li S, et al.: Circular RNA circZNF292 regulates H(2) O(2) -induced injury in human lens epithelial HLE-B3 cells depending on the regulation of the miR-222-3p/E2F3 axis. *Cell Biol Int* 45: 1757-1767, 2021.
58. Zhou C, Huang X, Li X and Xiong Y: Circular RNA erythrocyte membrane protein band 4.1 assuages ultraviolet irradiation-induced apoptosis of lens epithelial cells by stimulating 5'-bisphosphate nucleotidase 1 in a miR-24-3p-dependent manner. *Bioengineered* 12: 8953-8964, 2021.
59. Liu T, Zhao L, Yan D and Wang N: Circ\_0060,144 inhibits the occurrence and development of age-related cataract via the miR-23b-3p/HIPK3 axis. *Exp Eye Res* 222: 109179, 2022.
60. He J, Xie P and Ouyang J: Circ\_0122396 Protects Human Lens Epithelial Cells from Hydrogen Peroxide-induced Injury by Binding to miR-15a-5p to Stimulate FGF1 Expression. *Curr Eye Res* 47: 246-255, 2022.
61. Wu Q, Liu H, Ma B and Wang C: Circular RNA Circ\_0122396 Regulates Human Lens Epithelial Cell Progression by Regulating miR-23a-3p and MMP16 in Age-Related Cataract. *Curr Eye Res* 49: 1161-1170, 2024.
62. Cui F, Sun Z, Zhang X and Liu C: CircMAP3K4 Suppresses H2O2-Induced Human Lens Epithelial Cell Injury by miR-630/ERCC6 Axis in Age-Related Cataract. *Curr Eye Res* 49: 487-495, 2024.
63. Ma Y, Liu Y, Shu B, et al.: CircMAP3K4 protects human lens epithelial cells from H(2)O(2)-induced dysfunction by targeting miR-193a-3p/PLCD3 axis in age-related cataract. *Cell Cycle* 22: 303-315, 2023.
64. Wang Y, Wu Z, Huang Y and Zhang Y: Hsa\_circ\_0004058 inhibits apoptosis of SRA01/04 cells by promoting autophagy via miR-186/ATG7 axis. *Exp Eye Res* 211: 108721, 2021.

65. Mao W and Zhang Z: The Hsa\_circ\_0105558/miR-182-5p/ATF6 Cascade Affects H<sub>2</sub>O<sub>2</sub>-Triggered Oxidative Damage and Apoptosis of Human Lens Epithelial Cells. *Biochem Genet* 63: 1241-1257, 2025.
66. Liu J, Zhang J, Zhang G, et al.: CircMRE11A\_013 binds to UBXN1 and integrates ATM activation enhancing lens epithelial cells senescence in age-related cataract. *Aging (Albany NY)* 13: 5383-5402, 2021.
67. Wu B, Sun Y and Hou J: CircMED12L Protects Against Hydrogen Peroxide-induced Apoptotic and Oxidative Injury in Human Lens Epithelial Cells by miR-34a-5p/ALCAM axis. *Curr Eye Res* 47: 1631-1640, 2022.
68. Fang R, Li JH, Li HL, et al.: CircRNA 06209 inhibits cataract development by sponging miR-6848-5p and regulating ALOX15 expression. *Exp Eye Res* 235: 109640, 2023.
69. Sun L, Li F, Bai S and Bi C: CircRNA HLCS regulates lens epithelial cell apoptosis via miR-338-3p/BPNT1 axis. *Int Ophthalmol* 44: 142, 2024.
70. Li R, Zhu H, Li Q, Tang J, Jin Y and Cui H: METTL3-mediated m<sup>6</sup>A modification of has\_circ\_0007905 promotes age-related cataract progression through miR-6749-3p/EIF4EBP1. *PeerJ* 11: e14863, 2023.
71. Li D, Che X, Gao N and Li J: CircSTRBP contributes to H<sub>2</sub>O<sub>2</sub>-induced lens epithelium cell dysfunction through increasing NOX4 mRNA stability by recruiting IGF2BP1. *Exp Eye Res* 241: 109817, 2024.
72. Guo M, Su F, Chen Y and Su B: Ectopic circSTK39 Expression Ameliorates Hydrogen Peroxide-Induced Human Lens Epithelial Cell Apoptosis and Oxidative Stress through the miR-125a-5p/ERCC6 Pathway. *Curr Eye Res* 48: 278-288, 2023.
73. Wang Y, Li F, Zhang G, Kang L and Guan H: Ultraviolet-B induces ERCC6 repression in lens epithelium cells of age-related nuclear cataract through coordinated DNA hypermethylation and histone deacetylation. *Clin Epigenetics* 8: 62, 2016.
74. Zhou P, Luo Y, Liu X, Fan L and Lu Y: Down-regulation and CpG island hypermethylation of CRYAA in age-related nuclear cataract. *Faseb j* 26: 4897-4902, 2012.
75. Wang Y, Li F, Zhang G, Kang L, Qin B and Guan H: Altered DNA Methylation and Expression Profiles of 8-Oxoguanine DNA Glycosylase 1 in Lens Tissue from Age-related Cataract Patients. *Curr Eye Res* 40: 815-821, 2015.
76. Gao Y, Yan Y and Huang T: Human age-related cataracts: epigenetic suppression of the nuclear factor erythroid 2-related factor 2-mediated antioxidant system. *Mol Med Rep* 11: 1442-1447, 2015.
77. Wang Z, Sun Y, Zhang Y, et al.: Identification of seven variants in the col4a1 gene that alter RNA splicing by minigene assay. *Clin Genet* 106: 336-341, 2024.
78. Zhu X, Zhang G, Kang L and Guan H: Epigenetic Regulation of Werner Syndrome Gene in Age-Related Cataract. *J Ophthalmol* 2015: 579695, 2015.
79. Li F, Wang Y, Zhang G, Zhou J, Yang L and Guan H: Expression and methylation of DNA repair genes in lens epithelium cells of age-related cataract. *Mutat Res* 766-767: 31-36, 2014.
80. Chen J, Zhou J, Wu J, et al.: Aberrant Epigenetic Alterations of Glutathione-S-Transferase P1 in Age-Related Nuclear Cataract. *Curr Eye Res* 42: 402-410, 2017.
81. Li B, Zhou J, Zhang G, et al.: Relationship Between the Altered Expression and Epigenetics of GSTM3 and Age-Related Cataract. *Invest Ophthalmol Vis Sci* 57: 4721-4732, 2016.
82. Jin SL, Zhang Y, Chen ZH, et al.: Epigenetic changes of the Klotho gene in age-related cataracts. *Eur Rev Med Pharmacol Sci* 19: 2544-2553, 2015.
83. Rong X, Qiu X, Jiang Y, et al.: Effects of histone acetylation on superoxide dismutase 1 gene expression in the pathogenesis of senile cataract. *Sci Rep* 6: 34704, 2016.
